# Supplementary material for: CoPt nanoparticles and their catalytic properties in electrooxidation of CO and CH3OH studied by in situ FTIRS
Source: Royal Society of Chemistry journal article supplement (doi:10.1039/b802047g), 2008-01-01
Supplement: b802047g.pdf [file b802047g.pdf]

## Supplementary data

### CoPt Nanoparticles and Their Catalytic Properties in Electrooxidation of CO and CH<sub>3</sub>OH Studied by *In Situ* FTIRS

Qing-Song Chen, Shi-Gang Sun\*, Zhi-You Zhou, Yan-Xin Chen, Shi-Bin Deng

*State Key Laboratory of Physical Chemistry of Solid Surfaces, Department of Chemistry, College of Chemistry  
and Chemical Engineering, Xiamen University, Xiamen 361005, China.*

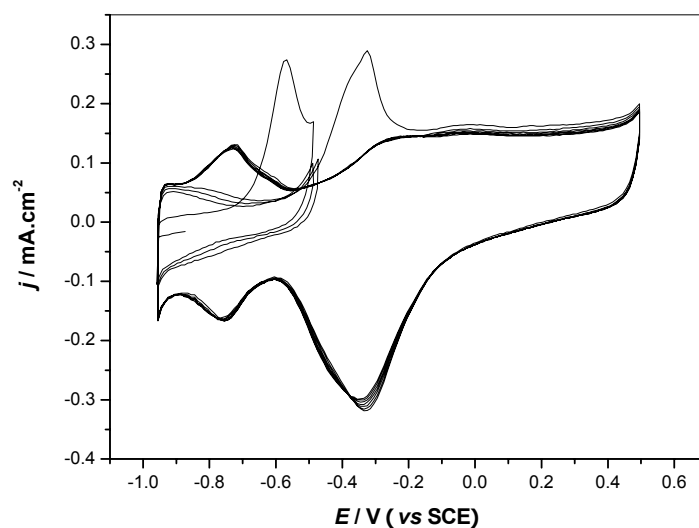

Fig. S1 CVs of adsorbed CO oxidation on CoPt/GC, 0.1M NaOH solution, scan rate 50 mV·s<sup>-1</sup>.

After CO adsorption in saturation on CoPt/GC and complete removal of CO in solution by bubbling N<sub>2</sub>, the electrode potential was cycled firstly between -0.96 and ca. -0.48V (near the splitting of two oxidation peak) for three times, in which the pre-peak has been disappeared completely from CV. The electrode potential is then scanned to 0.50 V, illustrating that the following-peak is still remained in the CV.

\* Corresponding author, Fax: +86 0592 2183047, E-mail: sgsun@xmu.edu.cn

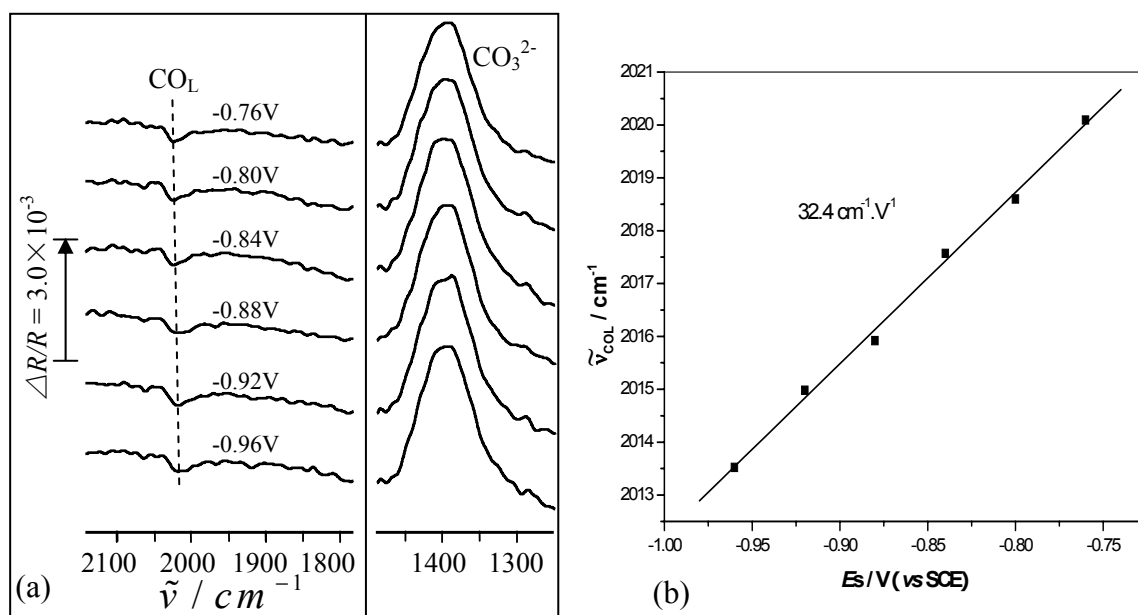

Fig. S2 (a) MSFTIR spectra of CO adsorbed in saturation on surface of bulk Pt (a polycrystalline Pt rod of 5 mm in diameter sealed into a Teflon holder),  $E_S = -0.96 \sim -0.76 \text{ V}$ ,  $E_R = -0.3 \text{ V}$ , 0.1 M NaOH solution; (b) Variation of  $\tilde{\nu}_{\text{CO}_L}$  with  $E_S$ .

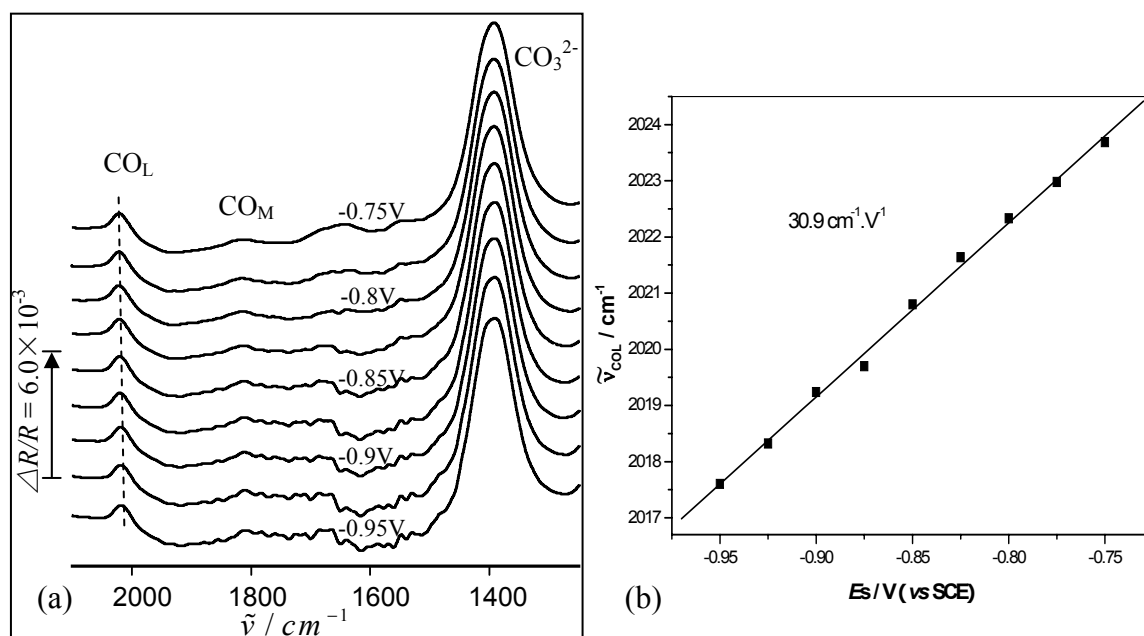

Fig. S3 (a) MSFTIR spectra of CO adsorbed in saturation on Pt/GC,  $E_S = -0.95 \sim -0.75$  V,  $E_R = -0.3$  V, 0.1 M NaOH solution; (b) Variation of  $\tilde{\nu}_{\text{COL}}$  with  $E_S$
